# Supplementary material
Source: PubMed Central journal article supplement (PMC5612668)
Supplement: NIHMS905795-supplement-Supplementary_Information.pdf [file NIHMS905795-supplement-Supplementary_Information.pdf]

## Supplementary Information

### TGF- $\beta$ Stimulation of EMT Programs Elicits Non-genomic ER $\alpha$ Activity and Anti-estrogen Resistance in Breast Cancer Cells

Maozhen Tian and William P. Schiemann

**Author Affiliation:** Case Comprehensive Cancer Center, Case Western Reserve University, Cleveland, OH 44106.

**Corresponding Author:**

William P. Schiemann, Case Comprehensive Cancer Center, Case Western Reserve University, Wolstein Research Building, 2103 Cornell Road, Cleveland, OH 44106 Phone: 216-368-5763. Fax: 216-368-1166. E-mail: [william.schiemann@case.edu](mailto:william.schiemann@case.edu)

**Running Title:** EMT Drives Anti-estrogen Resistance in Breast Cancer

**Supplementary Table 1: Pharmacological agonists and inhibitors**

| <b>Name</b>            | <b>Target</b>     | <b>Concentration</b> | <b>Supplier (USA)</b> |
|------------------------|-------------------|----------------------|-----------------------|
| Human TGF- $\beta$ 1   | TGF- $\beta$ Rec. | 5 ng/ml              | R&D Systems           |
| T $\beta$ R-I Inh II   | T $\beta$ R-I     | 100 ng/ml            | Calbiochem            |
| U0126                  | MEK1/2            | 10 $\mu$ M           | Promega               |
| PP2                    | Src               | 5-10 $\mu$ M         | Calbiochem            |
| 17- $\beta$ -estradiol | ER- $\alpha$      | 0.1-1 nM             | Sigma                 |
| Tamoxifen              | ER- $\alpha$      | 0.1 $\mu$ M          | Sigma                 |
| 4-OH-tamoxifen         | ER- $\alpha$      | 0.1 $\mu$ M          | Sigma                 |
| Fulvestrant            | ER- $\alpha$      | 0.1 $\mu$ M          | Sigma                 |
| AG1024                 | IGFR              | 1 $\mu$ M            | Calbiochem            |
| AG1478                 | EGFR              | 1 $\mu$ M            | Cayman Chemicals      |

Shown are the pharmacological antagonists and final concentrations used inhibit the indicated protein targets. Also provided are the vendors where these reagents were obtained. *Rec.*, receptors.

**Supplementary Table 2: Real-time PCR primer pairs**

| <b>Gene</b>      | <b>Genbank Access #</b> | <b>Forward Primer (5' to 3')</b> | <b>Reverse Primer (5' to 3')</b> |
|------------------|-------------------------|----------------------------------|----------------------------------|
| ZO-1             | NM_003257               | 5'-TCTAAGGGAGCACATGGTGA          | 5'-ATCTTCTCGGTTTGGTGGTC          |
| Twist            | NM_000474               | 5'-CCTTCTCGGTCTGGAGGAT           | 5'-TTCTCCTTCTCTGGAAACAATG        |
| Snail1           | NM_005985               | 5'-CTAGGCCCTGGCTGCTAC            | 5'-GACATCTGAGTGGGTCTGGA          |
| Zeb1             | NM_030751               | 5'-TTTCCCATTCTGGCTCCTAT          | 5'-GATGCTGAAAGAGACGGTGA          |
| Zeb2             | NM_014795               | 5'-GCCCTTTAGGAGTTCATCCA          | 5'-GGCTTCCATCCCTACACCTA          |
| E-cad            | NM_004360               | 5'-CATCTTTGTGCCTCCTGAAA          | 5'-TGGGCAGTGTAGGATGTGAT          |
| N-cad            | NM_001792               | 5'-CCTGCTTATCCTTGTGCTGA          | 5'-CCTGGTCTTCTTCTCCTCCA          |
| Vimentin         | NM_003380               | 5'-CAAAGCAGGAGTCCACTGAG          | TAAGGGCATCCACTTCACAG             |
| CK19             | NM_002276               | 5'-GATAGTGAGCGGCAGAATCA          | 5'-GACCTTGGAGGCAGACAAAT          |
| EGFR             | NM_005228               | 5'-TTCTTGCAGCGATACAGCTC          | 5'-GGGAACGGACTGGTTTATGT          |
| IGF1R            | NM_000875               | 5'-CAATGCTTCAGTTCCTTCCA          | 5'-GAGGGTTCCACTTCACGATT          |
| MMP9             | NM_004994               | 5'-CCACCACAACATCACCTATTG         | 5'-CTGTACACGCGAGTGAAGGT          |
| ER- $\alpha$     | NM_000125               | 5'-TCCAAAGAGAAGACCCTATCAATGTA    | 5'-AGTAAGTCCCTATTTGTTTCAGC       |
| ER- $\beta$      | NM_001437               | 5'-TCGCTAGAACACACCTTACC          | 5'-TTCACACGACCAGACTCCATA         |
| Cox2             | NM_000963               | 5'-CCTTCCTCCTGTGCCTGATG          | 5'-ACAATCTCATTGAATCAGGAAGCT      |
| $\beta$ -Catenin | NM_001904               | 5'-TGCTAAATGACGAGGACCAG          | 5'-TGAGGAGAACGCATGATAGC          |
| GAPDH            | NM_002046               | 5'-TCCATGACAACCTTTGGTATTCGT      | 5'-AGTAGAGGCAGGGATGATGTT         |

Shown are the sense and antisense primers used to amplify the indicated target gene.

**Supplemental Table 5:** Immunoblotting antibodies

| <b>Antibody</b>  | <b>Dilution</b> | <b>Supplier (catalog #)</b> |
|------------------|-----------------|-----------------------------|
| Phospho-Smad2    | 1:1000          | Cell Signaling (#3101)      |
| Total Smad2/3    | 1:1000          | Cell Signaling (#3102)      |
| $\beta$ -catenin | 1:1000          | BD Biosciences (#610154)    |
| Phospho-IGF1R    | 1:1000          | Cell Signaling (#3024)      |
| Total IGF1R      | 1:1000          | Santa Cruz (#sc-713)        |
| Total EGFR       | 1:1000          | Cell Signaling (#2646)      |
| Phospho-Erk1/2   | 1:1000          | Cell Signaling (#9101)      |
| Total Erk1/2     | 1:1000          | Cell Signaling (#4695)      |
| Phospho-p38 MAPK | 1:500           | Cell Signaling (#4060)      |
| Total p38 MAPK   | 1:1000          | Santa Cruz (#sc-728)        |
| Phospho-Src      | 1:500           | Cell Signaling (#2113)      |
| Total Src        | 1:1000          | Cell Signaling (#2108)      |
| E-Cadherin       | 1:5000          | BD Biosciences (#610182)    |
| N-Cadherin       | 1:1000          | Cell Signaling (#4061)      |
| HDAC1            | 1:1000          | Santa Cruz (#sc-8410)       |
| $\beta$ -Actin   | 1:1000          | Santa Cruz (#sc-1616)       |

Shown are the antibodies and dilutions used to visualize the indicated proteins. Also provided are the vendors where these reagents were obtained.

## Supplementary Figure S1: Tian &amp; Schiemann

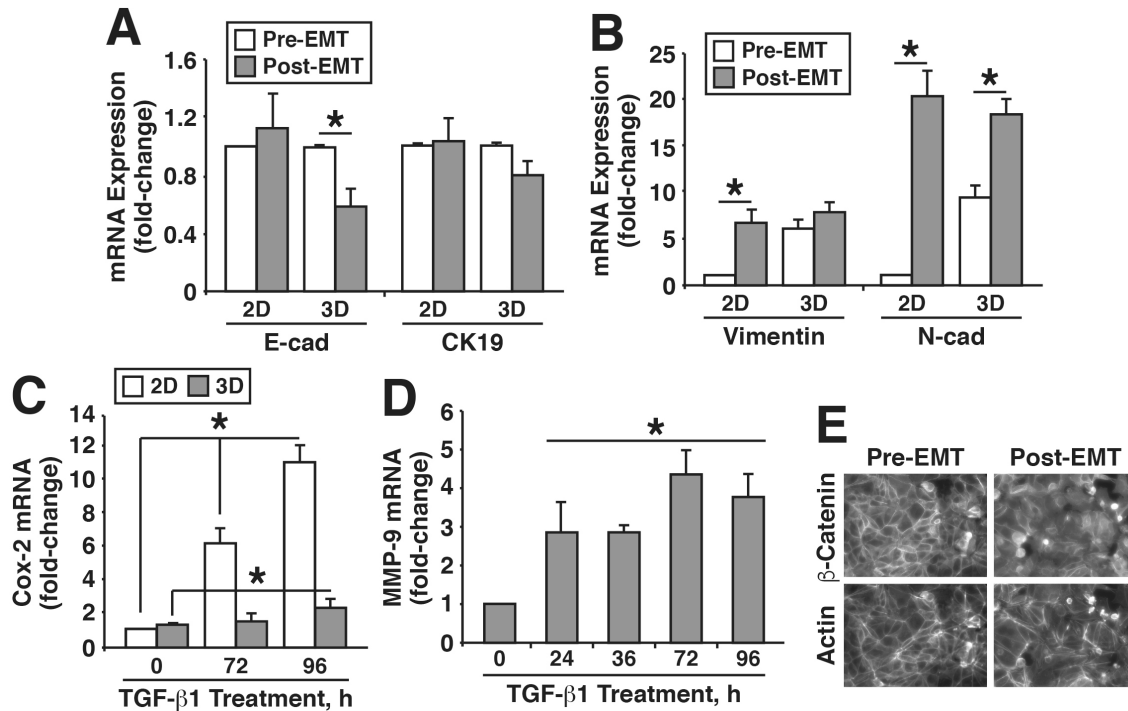

**Supplementary Figure S1:** TGF- $\beta$  induces EMT phenotypes in MCF-7 cells in both 2D- and 3D-cultures. **(A-C)** MCF-7 cells were propagated in either 2D- or 3D-culture systems and treated with TGF- $\beta$ 1 (5 ng/ml) for either 72 h **(A and B)** or 96 h **(C)** in 2D-cultures, or for either 8 days **(A and B)** or 96 h **(C)** as indicated. Afterward, total RNA has harvested and subjected to real-time PCR analyses to monitor the expression of the epithelial markers E-cad and CK19 **(A)**, of the mesenchymal markers vimentin and N-cad **(B)**, or of Cox-2 **(C)**. **(D)** MCF-7 cells were stimulated with TGF- $\beta$ 1 for 0-96 h as indicated, at which point the levels of MMP-9 were monitored by real-time PCR. Data are the mean fold-changes ( $\pm$ S.E.;  $n=3$ ;  $*P<0.05$ ; Student's  $t$ -test). **(E)** MCF-7 cells were stimulated with TGF- $\beta$ 1 (5 ng/ml) for 96 h, and subsequently were fixed in paraformaldehyde and processed for indirect immunofluorescence of  $\beta$ -catenin, as well as for direct immunofluorescence of actin. Images are representative of 2-independent experiments (X 400).

## Supplementary Figure S2: Tian &amp; Schiemann

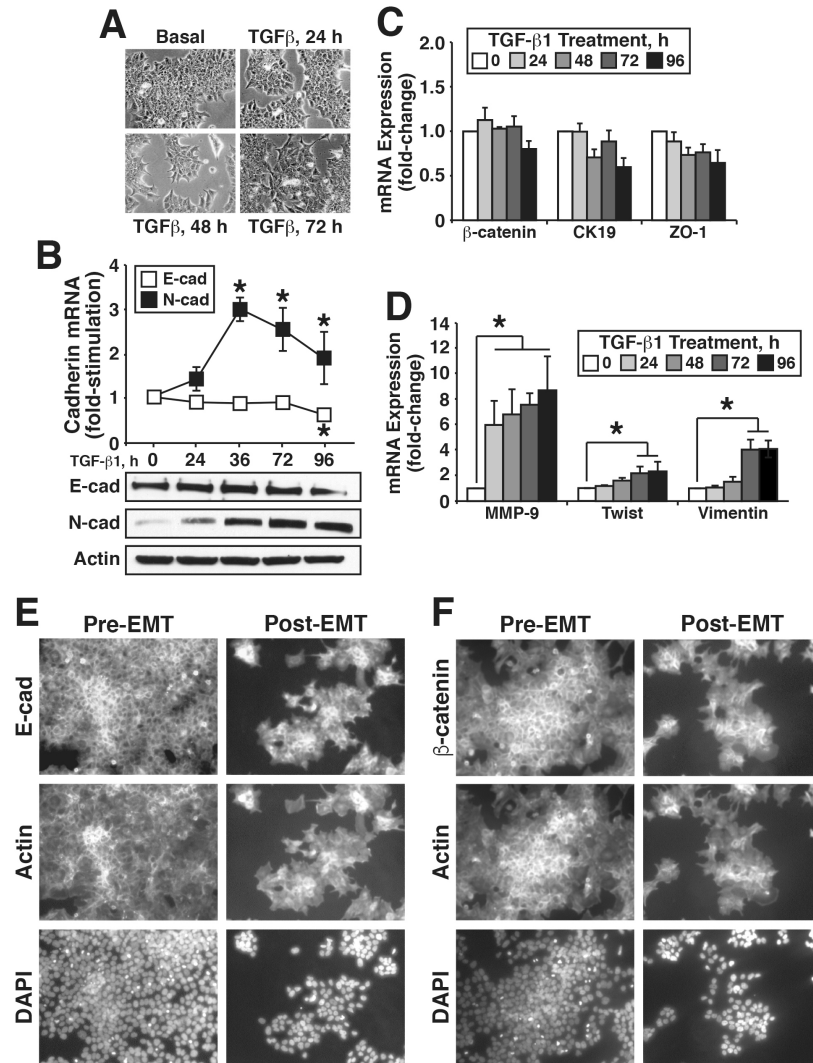

**Supplementary Figure S2:** TGF- $\beta$  induces EMT phenotypes in BT474 cells. **(A)** BT474 cells were treated with TGF- $\beta$ 1 (5 ng/ml) for 0-72 h to induce an EMT program. Photomicrographs depict accompanying alterations in cell morphology (X 400). **(B)** BT474 cells were stimulated with TGF- $\beta$ 1 (5 ng/ml) for 0-96 h as indicated, at which point differences in the expression of E-cad and N-cad mRNA (*top*) and protein (*bottom*) were determined. mRNA data are the mean fold-changes ( $\pm$ S.E.;  $n=3$ ;  $*P<0.05$ ; Student's *t*-test), while protein data are representative images from 3-independent experiments. **(C and D)** BT474 cells were treated with TGF- $\beta$ 1 (5 ng/ml) for 0-96 h, at which point the expression of  $\beta$ -catenin, CK19, and ZO-1 **(C)** or of MMP-9, Twist-1, and vimentin **(D)** were monitored by real-time PCR. Data are the mean fold-changes ( $\pm$ S.E.;  $n=3$ ;  $*P<0.05$ ; Student's *t*-test). **(E and F)** BT474 cells were stimulated with TGF- $\beta$ 1 (5 ng/ml) for 72 h, and subsequently were fixed in paraformaldehyde and processed for indirect immunofluorescence of either E-cad **(E)** or  $\beta$ -catenin **(F)**, as well as for direct immunofluorescence of actin **(E and F)**. Nuclei were visualized by DAPI staining. Images are representative from 3-independent experiments (X 400).

## Supplementary Figure S3: Tian &amp; Schiemann

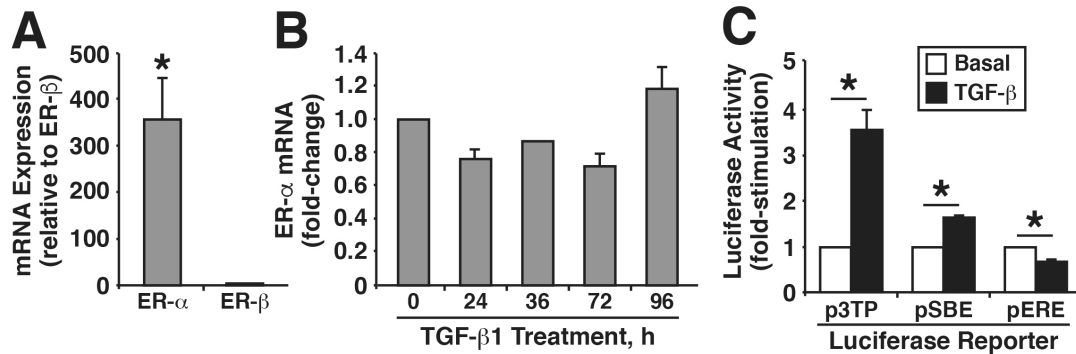

**Supplementary Figure S3:** TGF- $\beta$  regulates estrogen signaling and EGFR expression in BT474 cells. **(A)** Differential mRNA expression of ER- $\alpha$  and ER- $\beta$  in quiescent BT474 cells. **(B)** BT474 cells were stimulated with TGF- $\beta$ 1 (5 ng/ml) for 0-96 h as indicated. Afterward, total RNA was harvested and subjected to real-time PCR to monitor differences in ER- $\alpha$  expression. **(C)** BT474 cells were transiently transfected overnight with p3TP-, pSBE-, or pERE-luciferase and pCMV- $\beta$ -gal cDNAs prior to their stimulation for 24 h with TGF- $\beta$ 1 (5 ng/ml). Afterward, luciferase and  $\beta$ -gal activities contained in detergent-solubilized cell extracts were measured. Data are the mean fold-changes ( $\pm$ S.E.;  $n=3$ ; \* $P<0.05$ ; Student's  $t$ -test).

**Supplementary Figure S4: Tian & Schiemann**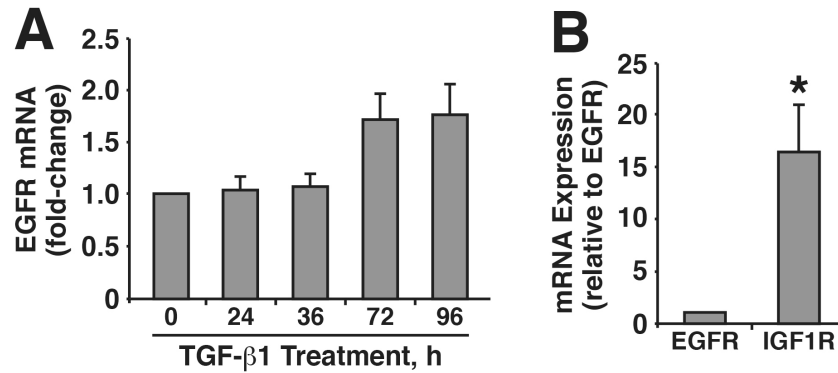

**Supplementary Figure S4:** TGF- $\beta$  regulates EGFR and IGF-1R expression in BT474 cells. **(A)** BT474 cells were stimulated with TGF- $\beta$ 1 (5 ng/ml) for 0-96 h as indicated, at which point differences in EGFR expression were monitored by real-time PCR. **(B)** Differential mRNA expression of EGFR and IGF-1R in quiescent BT474 cells. Data are the mean fold-changes ( $\pm$ S.E.; n=3; \* $P$ <0.05; Student's  $t$ -test).



## Supplementary Figure S5: Tian &amp; Schiemann

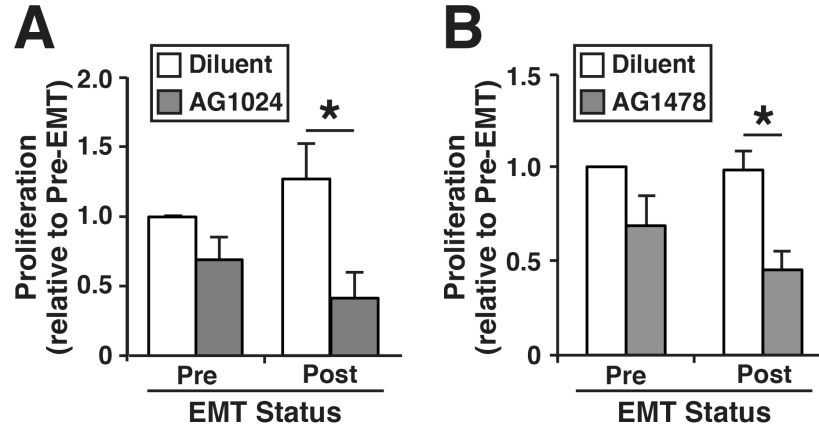

**Supplementary Figure S5:** Post-EMT cells are sensitized to inhibitors against IGF-1R and EGFR. Pre- and post-EMT MCF-7 cells were cultured in the absence (diluent) or presence of AG1024 (10  $\mu$ M; **A**) or AG1478 (10  $\mu$ M; **B**) for 5 days prior to analyzing differences in cell growth and survival by MTS assays. Data are the mean growth ( $\pm$ S.E.; n=3; \* $P$ <0.05; Student's  $t$ -test).
